# Supplementary material
Source: MDPI journal article supplement (https://www.mdpi.com/1999-4907/12/7/881)
Supplement: s1 [file s1 › forests-1252477-supplementary.pdf]

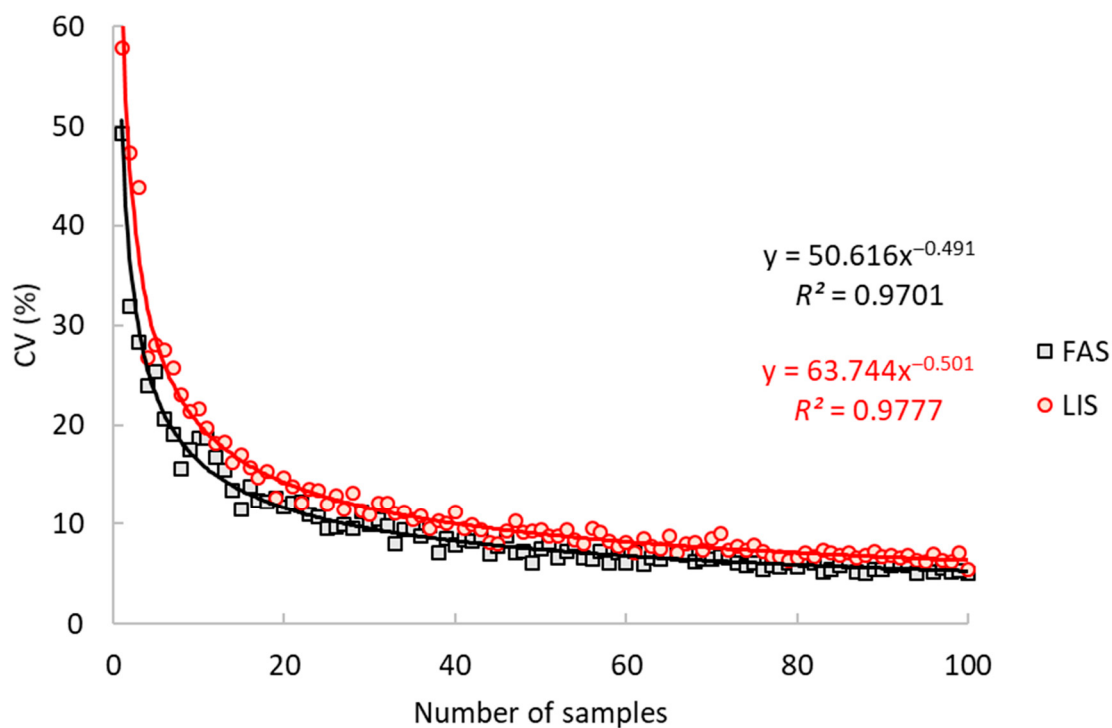

Figure S1: Sampling simulations from 1 to 100 plots, for the Forest Stands ( $N=10$ ), and the corresponding coefficient of variation (CV) of the estimated volume of pieces from 0 to 4 cm in diameter for the fixed-area sampling methods (FAS: black squares, quadrats of 0.46 m<sup>2</sup>) and line-intersect sampling method (LIS: red circles, 0.5-m transects). Mean of 100 simulations for each number of samples (squares and circles) and the adjusted model (solid lines)

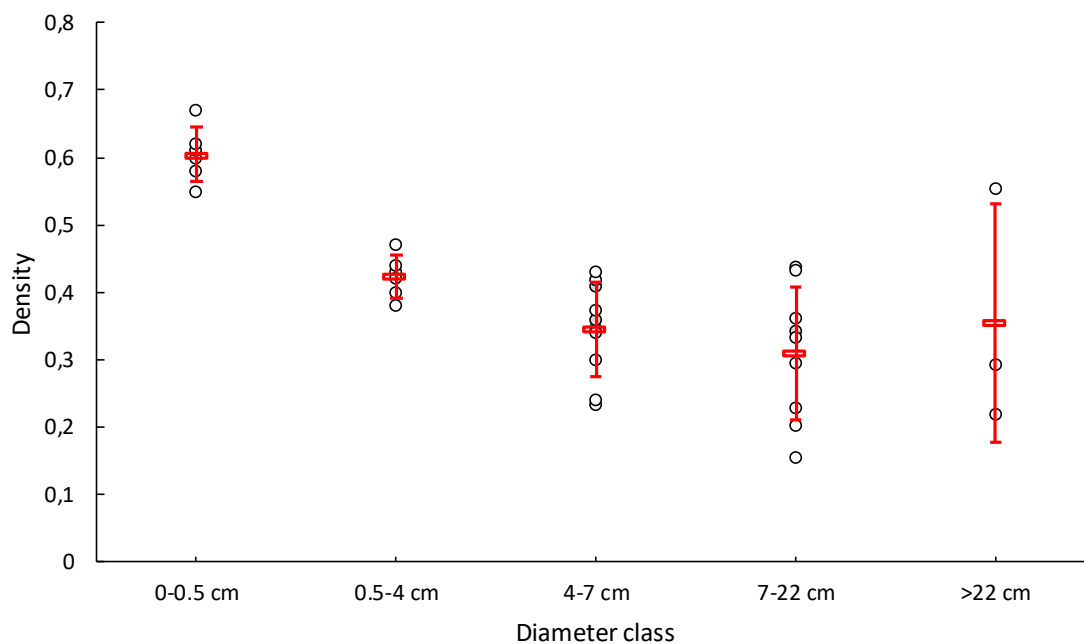

Figure S2: Mean debris density at the site level (circles) for the eight Forest Stands (10 inventories) and global means ( $n=10$ , red dash with a SD error bar) for each diameter class.
